# Supplementary material for: Alleviation of Cr(VI) Toxicity and Improve Phytostabilization Potential of Vigna radiata Using a Novel Cr(VI) Reducing Multi-Stress-Tolerant Plant Growth Promoting Rhizobacterial Strain Bacillus flexus M2
Source: MDPI journal article supplement (doi:10.3390/agronomy12123079), 2022-12-05
Supplement: s1 [file s1]

Alleviation of Cr(VI) Toxicity and Improve Phytostabilization Potential of *Vigna radiata* Using a Novel Cr(VI) Reducing Multi-Stress-Tolerant Plant Growth Promoting Rhizobacterial Strain *Bacillus flexus* M2

Supplementary figures

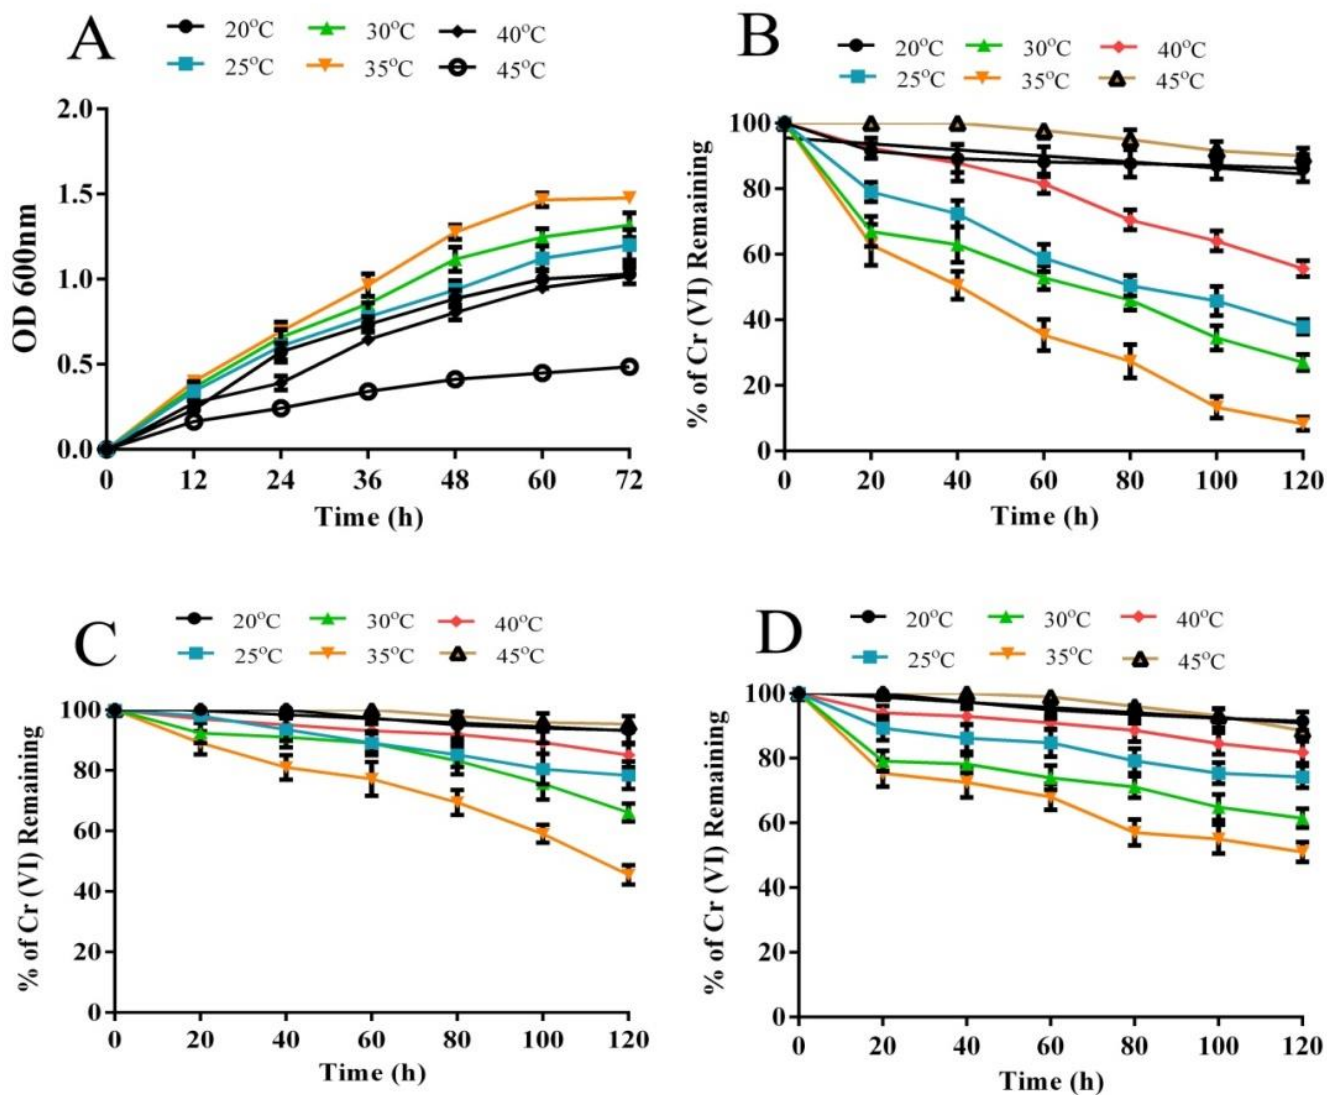

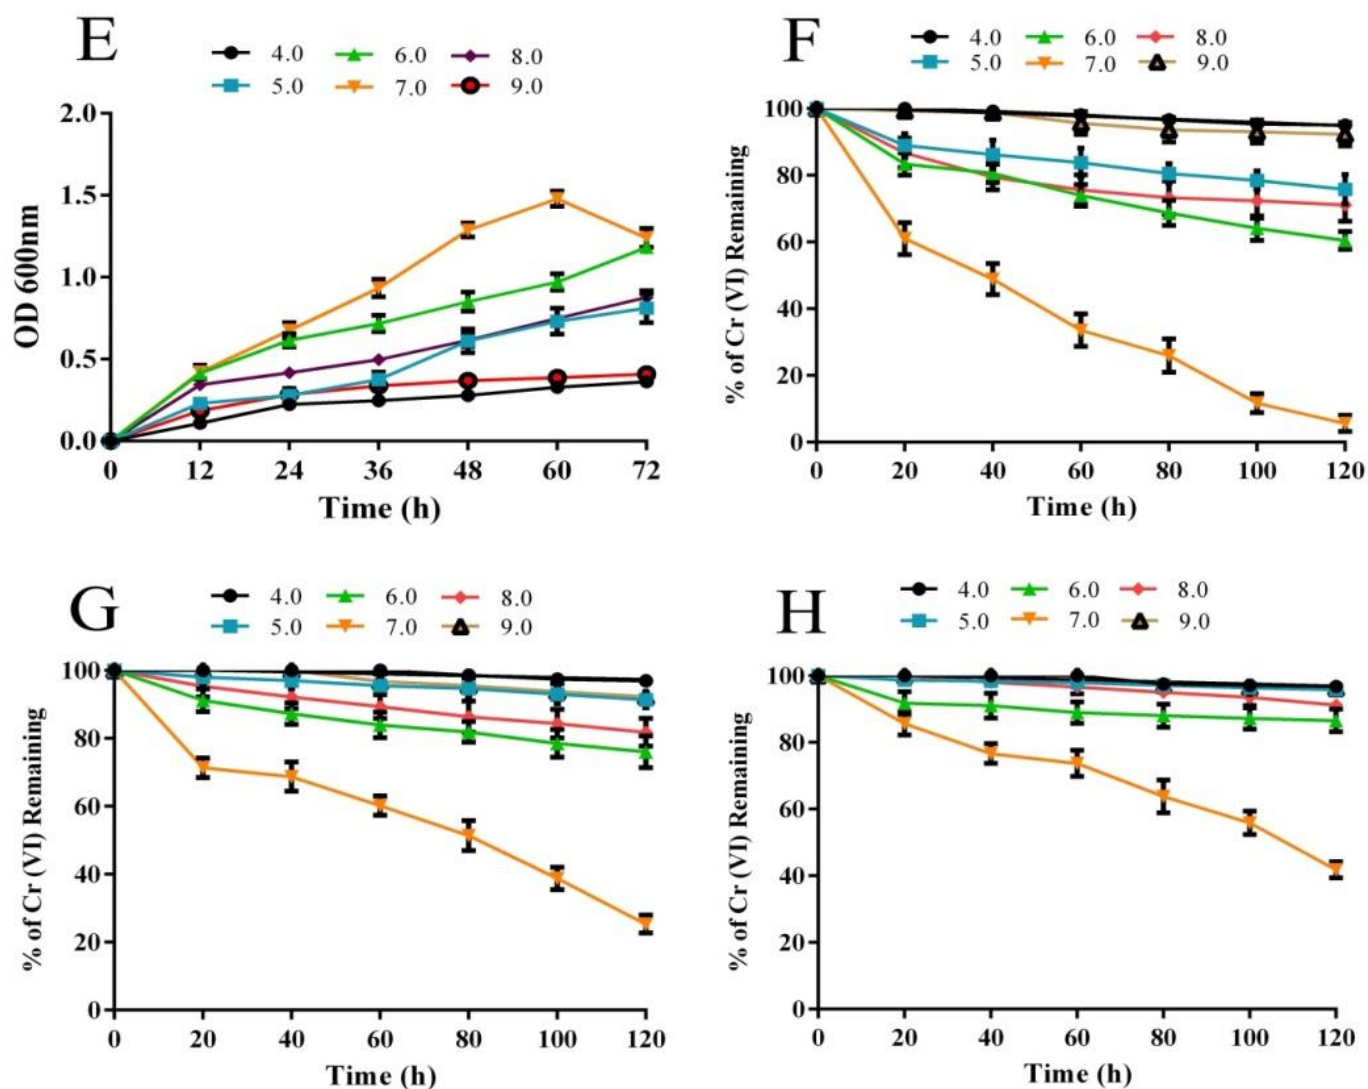

**Figure S1.** (A) Temperature tolerance by the rhizobacterial strain M2; influence of different temperatures on Cr(VI) reduction by the rhizobacterial strain M2 (B) Cr(VI) 100 mg/l, (C) Cr(VI) 200 mg/l, and (D) Cr(VI) 300 mg/l; (E) pH tolerance by the rhizobacterial strain M2; influence of different pH on Cr(VI) reduction by the rhizobacterial strain M2 (F) Cr(VI) 100 mg/l, (G) Cr(VI) 200 mg/l, and (H) Cr(VI) 300 mg/l.

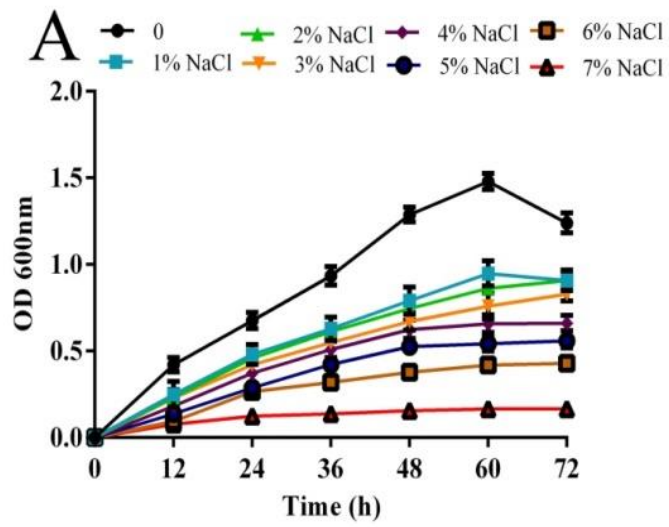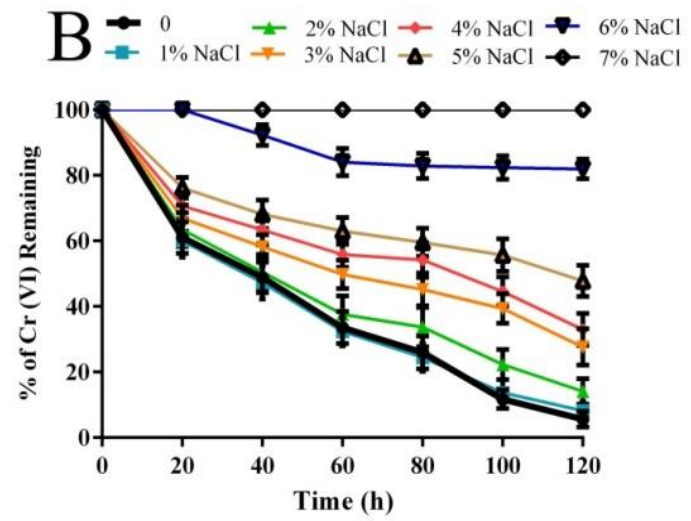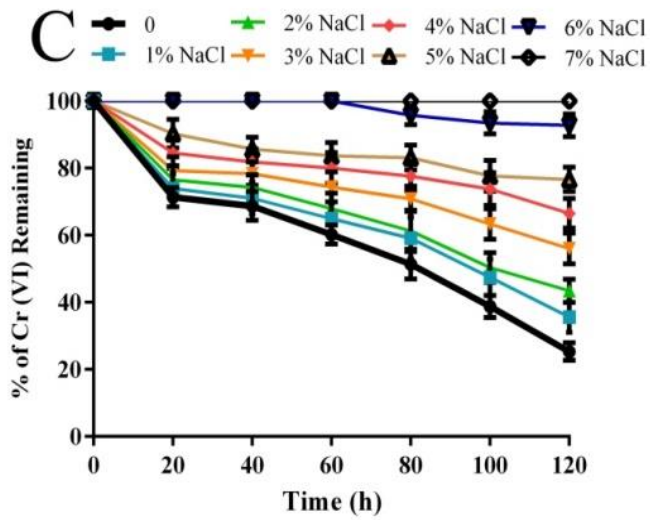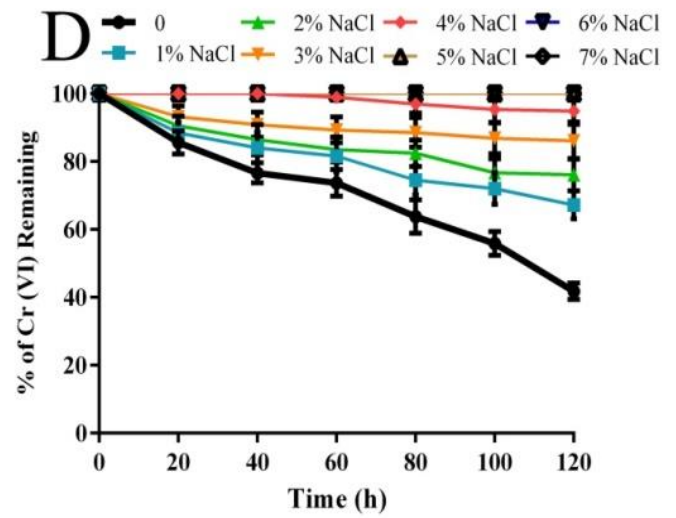

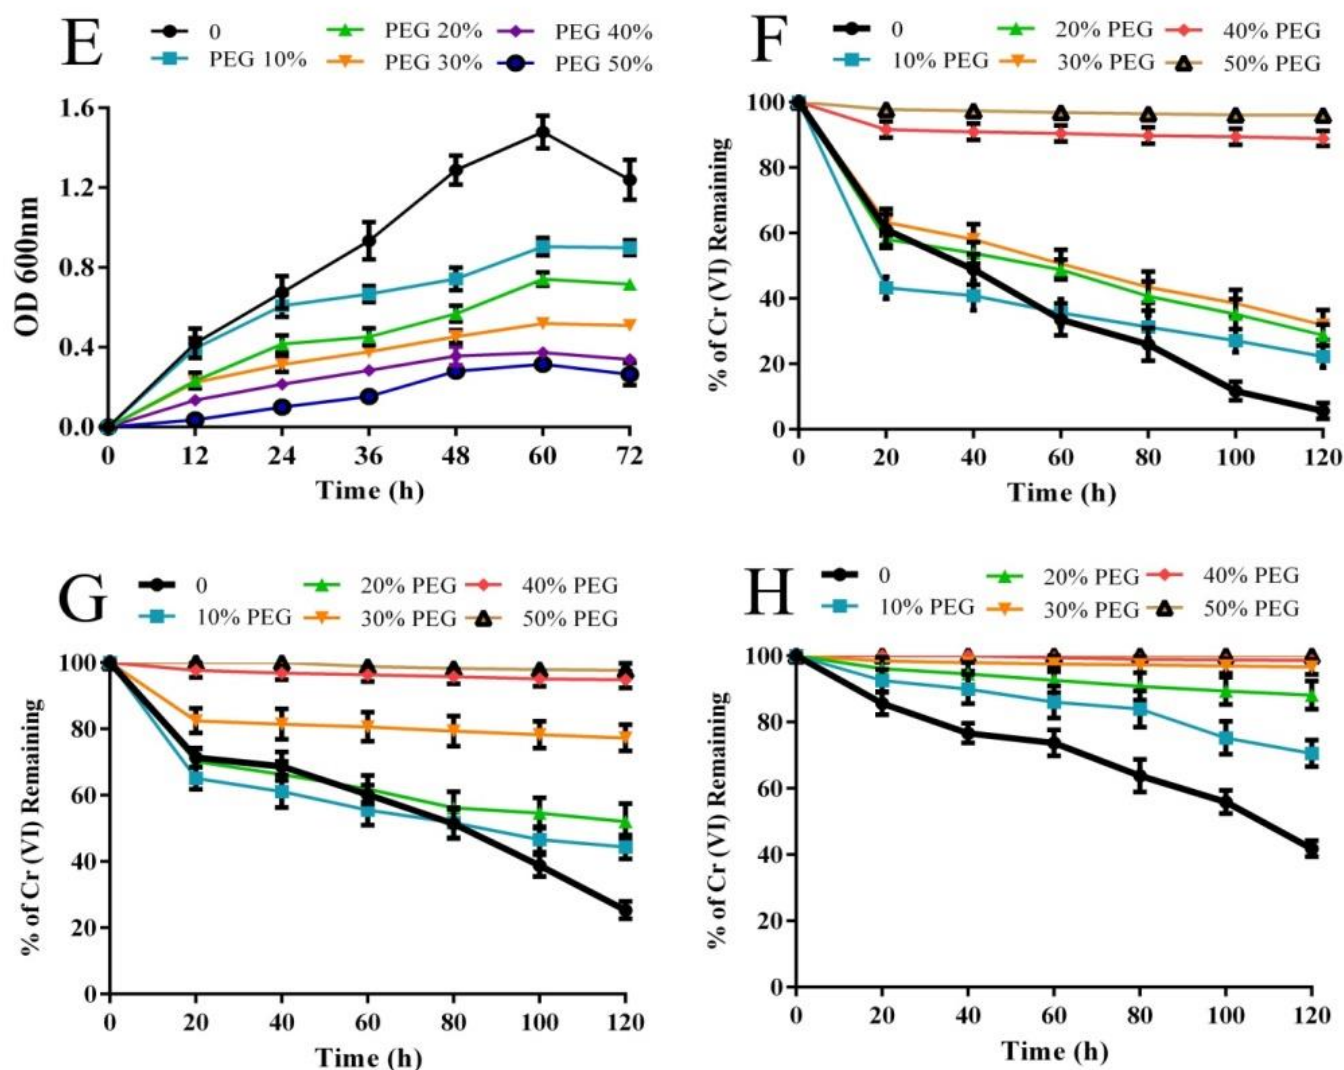

**Figure S2.** (A) NaCl tolerance ability of the rhizobacterial strain M2; influence of different NaCl concentration on Cr(VI) reduction by the rhizobacterial strain M2 (B) Cr(VI) 100 mg/l, (C) Cr(VI) 200 mg/l and (D) Cr(VI) 300 mg/l; (E) PEG tolerance ability of the rhizobacterial strain M2; influence of different PEG concentration on Cr(VI) reduction by the rhizobacterial strain M2 (F) Cr(VI) 100 mg/l, (G) Cr(VI) 200 mg/l and (H) Cr(VI) 300 mg/l.
