# Supplementary material for: Alleviation of Cr(VI) Toxicity and Improve Phytostabilization Potential of Vigna radiata Using a Novel Cr(VI) Reducing Multi-Stress-Tolerant Plant Growth Promoting Rhizobacterial Strain Bacillus flexus M2
Source: MDPI journal article supplement (doi:10.3390/agronomy12123079), 2022-12-05
Supplement: s1 [file s1]

Archive with 1 entries (1 files):
- agronomy-1977616-supplementary.pdf
